# Supplementary material
Source: Springer Nature journal article supplement (https://www.springermedizin.de/resource/supplementary/12936_2012_2609_MOESM2_ESM.pdf/9543310)

**A**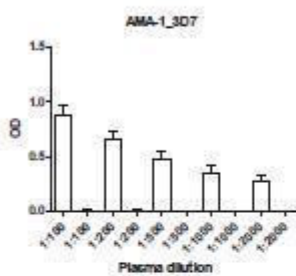**B**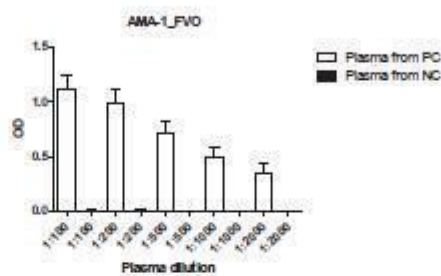**C**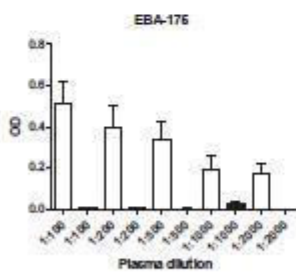**D**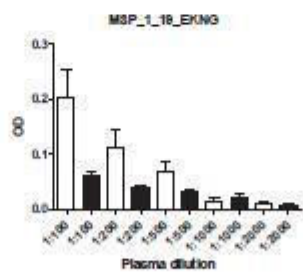**E**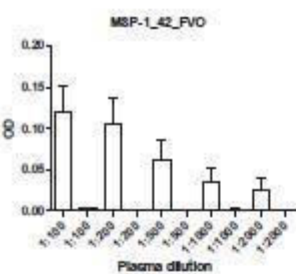**F**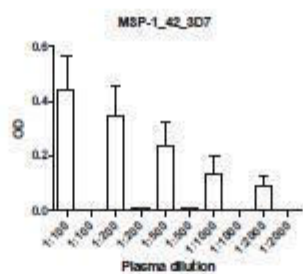**G**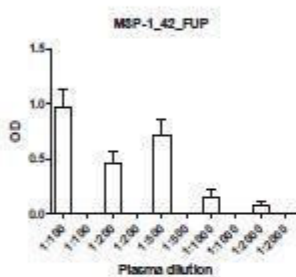**H**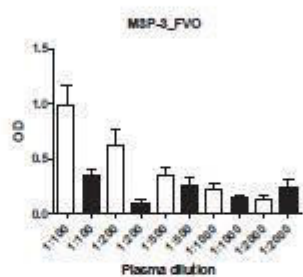**I**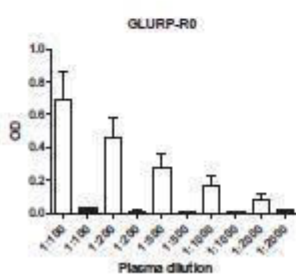**J**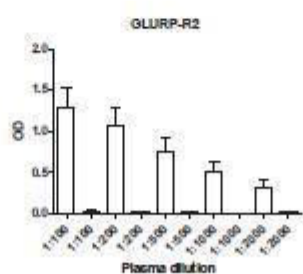

Supplement: MOESM2 [file 9543310]
